# Supplementary figures and images for: Chordal- (k,ℓ)and strongly chordal- (k,ℓ)graph sandwich problems
Source: Springer Nature journal article supplement (doi:10.1186/s13173-014-0016-6), 2014-09-10

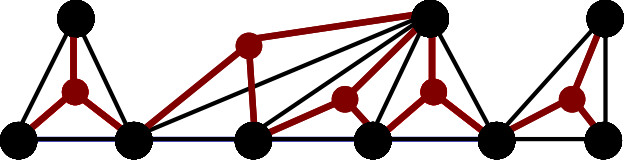
 $G'_2$ 
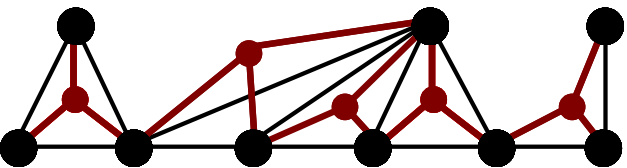
 $G'_1$ 
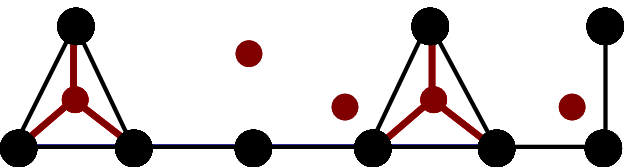
 $G'_1$

Supplement: MOESM10 [file 11899824]

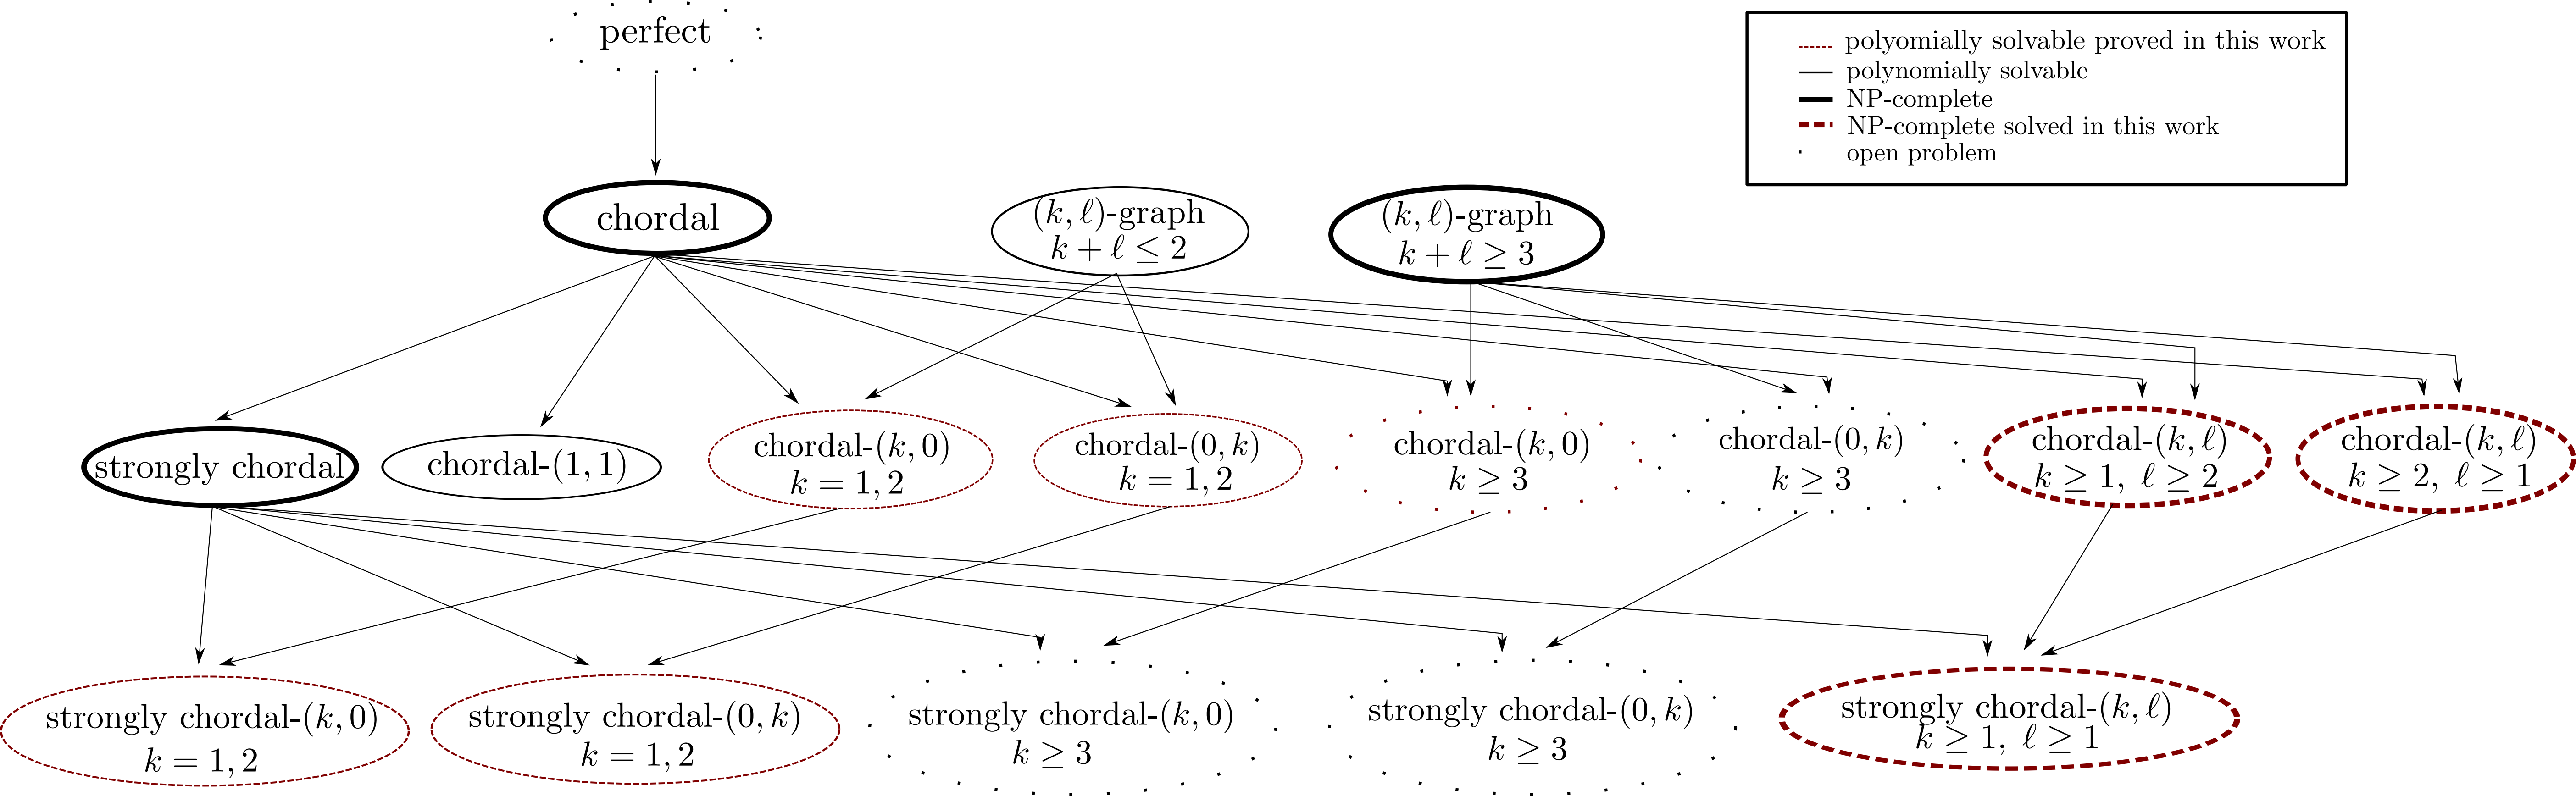

Supplement: MOESM11 [file 11899824]
